# Supplementary material for: Moisture Sorption Isotherms and Prediction Models of Carboxymethyl Chitosan Films from Different Sources with Various Plasticizers
Source: Hindawi journal article supplement (doi:10.1155/2019/4082439), 2019-01-08
Supplement: f1 [file 4082439.f1.doc]

**Supplementary material for: Moisture Sorption Isotherms and Prediction Models of Carboxymethyl Chitosan Films from Different Sources with Various Plasticizers**

Juthamas Tantalaa,b, Chitsiri Rachtanapuna,b, Wirongrong Tongdeesoontornc,
Kittisak Jantanasakulwong d,e, Pornchai Rachtanapund,e*

aDepartment of Food Science and Technology, Faculty of Agro-Industry, Kasetsart University, Bangkok 10900, Thailand

bCenter of International Standard Food Safety, Center for Advanced Studies Agriculture and Food, Kasetsart University, Bangkok 10900, ThailandcSchool of Agro-Industry, Mae Fah Luang University, Chiang Rai 57100, Thailand
dDivision of Packaging Technology, Faculty of Agro-Industry, Chiang Mai University, Chiang Mai 50100, Thailand

e Center of Excellence in Materials Science and Technology, Faculty of Science, Chiang Mai University, Chiang Mai 50200, Thailand

**Acknowledgments of support:** The authors gratefully acknowledge the National Research University Project under Thailand's Office of the Higher Education Commission (OHEC) for the financial support and the Kasetsart University Research and Development Institute (KU-RDI) for the partial financial support. This research was supported from graduate scholarship provided by the National Research Council of Thailand (NRCT) as of fiscal year 2017. We wish to thank Center of Excellence in Materials Science and Technology, Chiang Mai University for financial support under the administration of Materials Science Research Center, Faculty of Science, Chiang Mai University. This research work was partially supported by Chiang Mai University.

**Corresponding author:** Pornchai Rachtanapun, Ph.D., Division of Packaging Technology, Faculty of Agro-Industry, Chiang Mai University, Chiang Mai 50100, Thailand.
Tel.: +66 53 948228. E-mail address: pornchai.r@cmu.ac.th, rachtanapun.r@gmail.com

**Disclamiers:**  No conflict of interest and no competing financial interest

**Table S.1: Characteristics and sources of native chitosans.**

| Sources | Molecular size | Molecular weight (KDa) | Degree of deacetylation (%) |
| --- | --- | --- | --- |
| Shrimp | Oligomer | 30 – 50 | 97.15 |
|  | Polymer | 1,000 – 1,500 | 95.78 |
| Crab | Oligomer | 25 – 40 | 96.66 |
|  | Polymer | 700 – 1,000 | 97.38 |
| Squid | Oligomer | 50 – 80 | 95.70 |
|  | Polymer | 1,200 – 1,700 | 98.01 |

***Table S.2:*** *Relative humidity in control chamber*

| Chamber | % RH |
| --- | --- |
| 1. Potassium Acetate | 23 |
| 2. Magnesium Chloride | 34 |
| 3. Potassium Carbonate | 43 |
| 4. Sodium Nitrate | 65 |
| 5. Sodium Chloride | 77 |
| 6. Potassium Chloride | 86 |

**Table S.3:** Sorption Models

| **No.** | **Model** | **Equation** | **Constants** |
| --- | --- | --- | --- |
| 1 | Oswin |  | K, C |
| 2 | Caurie |  | A, K |
|  |  |  |  |
| 3 | Smith |  | A, B |
| 4 | Lewicki-2 |  | A, B |
| 5 | BET |  | M0, C |
| 6 | Halsey |  | A, B |
| 7 | Henderson |  | A, B |
| 8 | GAB |  | M0, C, K |
| 9 | Lewicki-3 |  | A, B, C |

*Note:* aw = water activity; M = moisture content at equilibrium (grams water per gram dry

matter); M0 = monolayer moisture content (grams water per gram dry matter); A, B, C, D, and K = moisture sorption constants.

**Table S.4:** Water solubility (%) of CMCH films1

| **Type of CMCH Film** | | **Plasticizer** | **%Solubility** |
| --- | --- | --- | --- |
| Polymer | Shrimp | - | 93.85 ± 4.39bcd |
|  |  | Gly | 90.30 ± 5.15bcd |
|  |  | Sor | 97.89 ± 1.65d |
|  |  | PEG 400 | 97.25 ± 3.95cd |
|  | Crab | - | 94.33 ± 4.74bcd |
|  |  | Gly | 94.65 ± 0.48bcd |
|  |  | Sor | 86.15 ± 9.90b |
|  |  | PEG 400 | 88.57 ± 3.72bc |
|  | Squid | - | 95.19 ± 2.57bcd |
|  |  | Gly | 92.15 ± 6.79bcd |
|  |  | Sor | 96.45 ± 0.99cd |
|  |  | PEG 400 | 95.77 ± 2.23cd |
| Oligomer | Shrimp |  | 93.59 ± 8.08bcd |
|  |  | Gly | 93.86 ± 1.68bcd |
|  |  | Sor | 93.20 ± 0.57bcd |
|  |  | PEG 400 | 94.51 ± 1.82bcd |
|  | Crab |  | 95.25 ± 2.90bcd |
|  |  | Gly | 94.45 ± 1.26bcd |
|  |  | Sor | 91.81 ± 3.04bcd |
|  |  | PEG 400 | 94.11 ± 2.31bcd |
|  | Squid |  | 89.17 ± 2.53bcd |
|  |  | Gly | 72.14 ± 10.48a |
|  |  | Sor | 96.05 ± 4.54cd |
|  |  | PEG 400 | 95.06 ± 3.79bcd |

*Note:* The values are given as mean ± standard deviation.

1Different letters in the same column indicate significant differences between the means obtained in Duncan’s test (*p*<0.05).

**Table S.5:** L*, a*, and b* values of CMCH films1

| **Type of CMCH** | | **Plasticizer** | **Color Parameter** | | |
| --- | --- | --- | --- | --- | --- |
| **L*** | **a*** | **b*** |
| Polymer | |  |  |  |  |
|  | Shrimp | - | 86.93 ± 0.41fg | −1.60 ± 0.03abc | 7.58 ± 0.20a |
|  |  | Gly | 86.96 ± 1.23fg | −1.58 ± 0.05abc | 6.62 ± 0.25a |
|  |  | Sor | 86.39 ± 0.16efg | −1.52 ± 0.04abc | 8.25 ± 0.41ab |
|  |  | PEG 400 | 87.57 ± 0.32fg | −1.71 ± 0.14abc | 7.94 ± 0.93a |
|  | Crab | - | 87.38 ± 0.26fg | −1.52 ± 0.03abc | 7.42 ± 0.32a |
|  |  | Gly | 86.12 ± 3.06efg | −1.48 ± 0.14abc | 7.61 ± 1.15a |
|  |  | Sor | 87.95 ± 0.84g | −1.47 ± 0.20abc | 6.93 ± 1.54a |
|  |  | PEG 400 | 86.64 ± 1.09fg | −1.74 ± 0.05abc | 9.61 ± 0.58b |
|  | Squid | - | 85.14 ± 0.55defg | −1.77 ± 0.29abc | 15.60 ± 1.68d |
|  |  | Gly | 85.24 ± 0.56defg | −1.50 ± 0.03abc | 12.74 ± 1.28c |
|  |  | Sor | 83.68 ± 0.84cde | −1.66 ± 0.08abc | 17.48 ± 1.56e |
|  |  | PEG 400 | 81.00 ± 1.51c | −1.30 ± 0.16cd | 15.26 ± 3.05d |
| Oligomer | |  |  |  |  |
|  | Shrimp | - | 84.65 ± 0.68def | −1.73 ± 0.05abc | 19.98 ± 1.83f |
|  |  | Gly | 83.00 ± 0.59cd | −1.33 ± 0.13bcd | 21.51 ± 1.44f |
|  |  | Sor | 84.81 ± 0.31def | −1.66 ± 0.05abc | 16.43 ± 0.80de |
|  |  | PEG 400 | 82.74 ± 1.20cd | −0.79 ± 0.50de | 25.40 ± 3.51g |
|  | Crab | - | 85.37 ± 0.59defg | −2.00 ± 0.06a | 16.92 ± 1.34de |
|  |  | Gly | 85.42 ± 0.64defg | −2.00 ± 0.06a | 16.90 ± 1.37de |
|  |  | Sor | 84.98 ± 0.89def | −1.95 ± 0.06ab | 16.74 ± 1.82de |
|  |  | PEG 400 | 83.51 ± 0.49cde | −1.73 ± 0.13abc | 21.59 ± 1.00f |
|  | Squid | - | 81.53 ± 1.54c | −0.68 ± 0.57ef | 28.70 ± 4.19h |
|  |  | Gly | 77.71 ± 1.54b | 2.13 ± 1.03g | 39.43 ± 2.80j |
|  |  | Sor | 81.04 ± 1.57c | −0.23 ± 0.52f | 32.72 ± 4.72i |
|  |  | PEG 400 | 67.16 ± 4.51a | 8.60 ± 3.23h | 50.14 ± 3.86k |

*Note:* The values are given as mean ± standard deviation.

1Different letters in the same column indicate significant differences between the means obtained in Duncan’s test (*p*<0.05).

**Table S.6:** Sorption Isotherm Model Constants of CMCH Polymer Films from Different Sources and Types of Chitosan at 25±1°C

| Model | | Constant | | CMCH Film | | | | | | | | | | | | | | | | | | | | | |
| --- | --- | --- | --- | --- | --- | --- | --- | --- | --- | --- | --- | --- | --- | --- | --- | --- | --- | --- | --- | --- | --- | --- | --- | --- | --- |
|  | |  | | Shrimp | | | | | | | | Crab | | | | | | | | Squid | | | | | |
|  | |  | | Plasticizer | | | | | | | | Plasticizer | | | | | | | | Plasticizer | | | | | |
|  | | | | - | | Gly | | Sor | | PEG400 | | - | | Gly | | Sor | | PEG400 | | - | | Gly | | Sor | PEG400 |
| Two parameters | | | |  | |  | |  | |  | |  | |  | |  | |  | |  | |  | |  |  |
| Oswin | | K | | 0.1549 | | 0.1586 | | 0.1356 | | 0.1336 | | 0.8702 | | 0.1274 | | 0.1285 | | 0.0855 | | 0.1033 | | 0.1301 | | 0.0862 | 0.0865 |
|  | | C | | 0.7200 | | 0.6584 | | 0.6663 | | 0.5488 | | 0.6312 | | 0.8029 | | 0.7379 | | 0.9985 | | 0.7689 | | 0.5304 | | 0.7525 | 0.8012 |
|  | | r2 | | 0.9645 | | 0.9637 | | 0.9288 | | 0.9612 | | 0.9953 | | 0.9903 | | 0.9253 | | 0.9982 | | 0.9912 | | 0.9890 | | 0.9871 | 0.9261 |
|  | | %RMS | | 15.5146 | | 14.0253 | | 21.6804 | | 11.1608 | | 6.9772 | | 13.6505 | | 26.8543 | | 11.5907 | | 15.0407 | | 5.0647 | | 63.0973 | 38.5005 |
| Caurie | | K | | -3.8309 | | -3.5958 | | -3.8001 | | -3.4221 | | -4.0458 | | -4.3004 | | -4.1091 | | -5.4472 | | -4.3462 | | -3.3674 | | -4.4885 | -4.6951 |
|  | | C | | 3.7784 | | 3.4014 | | 3.4790 | | 2.7681 | | 3.1534 | | 4.2676 | | 3.9233 | | 5.5949 | | 3.9965 | | 2.6264 | | 3.9242 | 4.2648 |
|  | | r2 | | 0.9807 | | 0.9850 | | 0.9616 | | 0.9828 | | 0.9761 | | 0.9879 | | 0.9317 | | 0.9856 | | 0.9687 | | 0.9903 | | 0.9930 | 0.8832 |
|  | | %RMS | | 15.1878 | | 6.7037 | | 11.6891 | | 8.2555 | | 13.8323 | | 14.4349 | | 32.8904 | | 28.9399 | | 24.3920 | | 5.9941 | | 43.2191 | 46.8450 |
| Smith | | A | | -0.0421 | | -0.0250 | | -0.0291 | | 0.0135 | | 0.0019 | | -0.0504 | | -0.0291 | | -0.0832 | | -0.0239 | | 0.0218 | | -0.0330 | -0.0110 |
|  | | B | | -0.2988 | | -0.2709 | | -0.2400 | | -0.1741 | | -0.1315 | | -0.2835 | | -0.2485 | | -0.2879 | | -0.2708 | | -0.1585 | | -0.1801 | -0.1741 |
|  | | r2 | | 0.9660 | | 0.9785 | | 0.9541 | | 0.9750 | | 0.9753 | | 0.9623 | | 0.9045 | | 0.9408 | | 0.9483 | | 0.9910 | | 0.9907 | 0.8485 |
|  | | %RMS | | 25.9373 | | 13.8740 | | 19.4177 | | 10.3961 | | 12.3379 | | 31.4043 | | 38.8092 | | 59.7194 | | 25.2539 | | 5.2449 | | 10.9452 | 47.3048 |
| Lewicki-2 | | A | | 1.1888 | | 1.1851 | | 1.1579 | | 1.1507 | | 1.1064 | | 1.1691 | | 1.1647 | | 1.1391 | | 1.1392 | | 1.1470 | | 1.1087 | 1.1269 |
|  | | B | | -0.1365 | | -0.1250 | | -0.1138 | | -0.0840 | | 0.0655 | | -0.1315 | | -0.1158 | | -0.1370 | | -0.0994 | | -0.0767 | | -0.0898 | -0.0832 |
|  | | r2 | | 0.9318 | | 0.9575 | | 0.9347 | | 0.9559 | | 0.9255 | | 0.9147 | | 0.8509 | | 0.8932 | | 0.8908 | | 0.9677 | | 0.9651 | 0.7647 |
|  | | %RMS | | 43.8970 | | 32.3591 | | 40.0054 | | 22.1090 | | 25.3606 | | 50.0953 | | 52.4423 | | 106.1993 | | 41.0323 | | 14.4600 | | 58.6916 | 57.7317 |
|  |  | |  | |  | |  | |  | |  | |  | |  | |  | |  | |  | |  | | |

**Table S.6:** (Continued)

| Model | Constant | CMCH Film | | | | | | | | | | | | | |
| --- | --- | --- | --- | --- | --- | --- | --- | --- | --- | --- | --- | --- | --- | --- | --- |
|  |  | Shrimp | | | | | | Crab | | | | Squid | | | |
|  |  | Plasticizer | | | | | | Plasticizer | | | | Plasticizer | | | |
|  | | - | Gly | Sor | PEG400 | | | - | Gly | Sor | PEG400 | - | Gly | Sor | PEG400 |
| Two parameters | |  |  |  |  | | |  |  |  |  |  |  |  |  |
| BET | M0 | 0.9291 | 1.4610 | 1.2428 | | 2.5531 | 0.7836 | | 0.4539 | 0.6400 | 0.0952 | 0.4370 | 2.5377 | 0.4441 | 0.2895 |
|  | C | 0.2696 | 0.1906 | 0.1926 | | 0.1002 | 0.1887 | | 0.4041 | 0.3090 | 0.9594 | 0.3525 | 0.0967 | 0.3065 | 0.4194 |
|  | r2 | 0.9608 | 0.9626 | 0.9270 | | 0.9645 | 0.9923 | | 0.9887 | 0.9203 | 0.9983 | 0.9913 | 0.9878 | 0.9863 | 0.9275 |
|  | %RMS | 17.2297 | 14.5438 | 23.4811 | | 12.8138 | 13.8323 | | 14.4349 | 27.7431 | 11.6097 | 15.9344 | 7.4531 | 43.2191 | 46.8450 |
| Hasley | A | 0.1097 | 0.1026 | 0.0887 | | 0.0742 | 0.0545 | | 0.1021 | 0.0936 | 0.0953 | 0.0789 | 0.0705 | 0.0641 | 0.0695 |
|  | B | 1.2109 | 1.2112 | 1.2117 | | 1.2122 | 1.2128 | | 1.2112 | 1.2115 | 1.2115 | 1.2121 | 1.2123 | 1.215 | 1.2124 |
|  | r2 | 0.9413 | 0.9126 | 0.8775 | | 0.8134 | 0.9501 | | 0.9874 | 0.9148 | 0.9856 | 0.9937 | 0.8226 | 0.9670 | 0.9456 |
|  | %RMS | 11.8441 | 13.9421 | 14.2627 | | 27.8782 | 23.4429 | | 9.0030 | 22.8023 | 56.4436 | 13.2862 | 60.6234 | 67.2729 | 33.2121 |
| Henderson | A | 3.1165 | 3.5540 | 3.9627 | | 6.1102 | 6.9379 | | 3.0490 | 3.4497 | 2.7644 | 3.8534 | 6.9937 | 4.6095 | 3.9986 |
|  | B | 0.7976 | 0.8872 | 0.8695 | | 1.0909 | 0.9497 | | 0.7035 | 0.7685 | 0.5422 | 0.7470 | 1.1478 | 0.7689 | 0.6974 |
|  | r2 | 0.9732 | 0.9790 | 0.9525 | | 0.9750 | 0.9765 | | 0.9851 | 0.9214 | 0.9894 | 0.9702 | 0.9881 | 0.9941 | 0.8834 |
|  | %RMS | 19.4987 | 10.1282 | 15.0917 | | 11.7967 | 16.1201 | | 25.0697 | 35.1592 | 29.3800 | 26.8384 | 7.5712 | 31.8950 | 48.1156 |

**Table S.6:** (Continued)

| Model | Constant | CMCH Film | | | | | | | | | | | | | | | | | |
| --- | --- | --- | --- | --- | --- | --- | --- | --- | --- | --- | --- | --- | --- | --- | --- | --- | --- | --- | --- |
|  |  | Shrimp | | | | | Crab | | | | | | | | | Squid | | | |
|  |  | Plasticizer | | | | | Plasticizer | | | | | | | | | Plasticizer | | | |
|  | | - | Gly | Sor | PEG400 | | - | | | Gly | | | Sor | | PEG400 | - | Gly | Sor | PEG400 |
| Three parameters | | | | | | | | | | | | | | | | | | | |
| GAB | M0 | 0.0919 | 0.0978 | 0.0255 | | 0.3340 | | | 1.5039 | | | 0.2218 | | 0.1853 | 0.1758 | 0.9276 | 1.7370 | 0.0725 | 1.3749 |
|  | C | 1.8744 | 2.2363 | 5.9139 | | 0.8544 | | | 0.1022 | | | 0.7187 | | 0.8702 | 0.6209 | 0.1846 | 0.1425 | 1.3763 | 0.1108 |
|  | K | 0.7805 | 0.6686 | 0.5445 | | 0.6649 | | | 1.0543 | | | 0.9486 | | 0.8952 | 1.0261 | 1.0515 | 0.9537 | 0.8399 | 1.0913 |
|  | r2 | 0.9763 | 0.9835 | 0.9642 | | 0.9779 | | | 0.9945 | | | 0.9904 | | 0.9217 | 0.9990 | 0.9940 | 0.9883 | 0.9942 | 0.9432 |
|  | %RMS | 19.6029 | 12.2257 | 17.2492 | | 13.5996 | | | 8.0517 | | | 16.9905 | | 31.6700 | 12.3716 | 14.6176 | 7.5754 | 36.7416 | 32.3304 |
| Lewicki-3 | A | 1.2270 | 1.3381 | 1.3206 | | 1.0655 | | 1.0456 | | | 0.9823 | | 0.9863 | | 0.9978 | 0.9845 | 1.0575 | 1.0229 | 0.9933 |
|  | B | 0.2727 | 0.1686 | 0.1608 | | 0.0145 | | 0.1458 | | | 0.4102 | | 0.3229 | | 0.6645 | 0.3709 | -0.0043 | 0.2893 | 0.4567 |
|  | C | 0.1134 | 0.0049 | 0.0178 | | -0.1819 | | 0.0360 | | | 0.2657 | | 0.1685 | | 0.5836 | 0.2548 | -0.1917 | 0.1856 | 0.3719 |
|  | r2 | 0.9714 | 0.9769 | 0.9481 | | 0.9757 | | 0.9806 | | | 0.9899 | | 0.9250 | | 0.9978 | 0.9834 | 0.9846 | 0.9926 | 0.9127 |
|  | %RMS | 16.6777 | 9.9873 | 17.7238 | | 12.6805 | | 17.0875 | | | 17.8105 | | 30.9258 | | 12.1894 | 22.1993 | 10.3235 | 47.5572 | 42.9049 |

**Table S.7:** Sorption Isotherm Model Constants of CMCH Oligomer Films from Different Sources and Types of Chitosan at 25±1°C

| Model | Constant | CMCH Film | | | | | | | | | | | |
| --- | --- | --- | --- | --- | --- | --- | --- | --- | --- | --- | --- | --- | --- |
|  |  | Shrimp | | | | Crab | | | | Squid | | | |
|  |  | Plasticizer | | | | Plasticizer | | | | Plasticizer | | | |
|  | | - | Gly | Sor | PEG400 | - | Gly | Sor | PEG400 | - | Gly | Sor | PEG400 |
| Two parameters | |  |  |  |  |  |  |  |  |  |  |  |  |
| Oswin | K | 0.1186 | 0.0936 | 0.1279 | 0.0885 | 0.1114 | 0.1223 | 0.0849 | 0.1055 | 0.0855 | 0.1044 | 0.1162 | 0.1096 |
|  | C | 0.8473 | 0.8922 | 0.7405 | 0.9985 | 0.5995 | 0.5119 | 0.6628 | 0.6670 | 0.9041 | 0.4832 | 0.5978 | 0.6113 |
|  | r2 | 0.9913 | 0.9619 | 0.9195 | 0.9982 | 0.9904 | 0.9634 | 0.9437 | 0.9807 | 0.9953 | 0.9996 | 0.9798 | 0.9554 |
|  | %RMS | 10.9620 | 26.0653 | 29.1306 | 11.5907 | 11.8292 | 13.3296 | 36.2172 | 13.7975 | 15.0355 | 1.6142 | 10.9549 | 14.4388 |
| Caurie | K | -4.5352 | -4.8768 | -4.1278 | -5.4472 | -3.7182 | -3.3939 | -4.2426 | -4.0153 | -5.0585 | -3.4371 | -3.6643 | -3.8145 |
|  | C | 4.5537 | 4.7556 | 3.9456 | 5.5949 | 2.9965 | 2.5512 | 3.4392 | 3.4298 | 4.9397 | 2.3481 | 2.9975 | 3.1251 |
|  | r2 | 0.9953 | 0.9203 | 0.9267 | 0.9856 | 0.9815 | 0.9760 | 0.9724 | 0.9931 | 0.9813 | 0.9899 | 0.9670 | 0.9706 |
|  | %RMS | 15.7133 | 37.2616 | 33.8242 | 28.9399 | 14.9554 | 13.0872 | 25.8122 | 7.4548 | 29.7123 | 5.0586 | 13.8779 | 15.1489 |
| Smith | A | -0.0691 | -0.0373 | -0.0280 | -0.0832 | 0.0083 | 0.0246 | -0.0155 | -0.0167 | -0.0533 | 0.0282 | 0.0071 | -0.0003 |
|  | B | -0.2953 | -0.2323 | -0.2474 | -0.2879 | -0.1571 | -0.1422 | -0.1475 | -0.1821 | -0.2367 | -0.1110 | -0.1647 | -0.1638 |
|  | r2 | 0.9723 | 0.8837 | 0.8961 | 0.9408 | 0.9782 | 0.9701 | 0.9635 | 0.9886 | 0.9419 | 0.9971 | 0.9696 | 0.9598 |
|  | %RMS | 36.2239 | 32.9876 | 40.2505 | 59.7194 | 15.5768 | 13.7479 | 30.2758 | 10.4402 | 39.3692 | 2.6307 | 13.0950 | 18.5274 |
| Lewicki-2 | A | 1.1589 | 1.1443 | 1.1650 | 1.1391 | 1.1327 | 1.1373 | 1.1013 | 1.1265 | 1.1313 | 1.1166 | 1.1371 | 1.1292 |
|  | B | -0.1382 | -0.1100 | -0.1150 | -0.1370 | -0.0762 | -0.0693 | -0.0742 | -0.0890 | -0.1137 | -0.0554 | -0.0800 | -0.0799 |
|  | r2 | 0.9315 | 0.8199 | 0.8370 | 0.8932 | 0.92644 | 0.9381 | 0.9330 | 0.9625 | 0.8853 | 0.9686 | 0.9360 | 0.9200 |
|  | %RMS | 62.2499 | 47.2441 | 53.2710 | 106.1993 | 27.4755 | 23.2846 | 45.7800 | 31.8763 | 63.7118 | 12.4778 | 22.8684 | 31.9705 |
| **Table S.7** (Continued)   | Model | Constant | CMCH Film | | | | | | | | | | | | | --- | --- | --- | --- | --- | --- | --- | --- | --- | --- | --- | --- | --- | --- | |  |  | Shrimp | | | | Crab | | | | Squid | | | | |  |  | Plasticizer | | | | Plasticizer | | | | Plasticizer | | | | |  | | - | Gly | Sor | PEG400 | - | Gly | Sor | PEG400 | - | Gly | Sor | PEG400 | | Two parameters | |  |  |  |  |  |  |  |  |  |  |  |  | | | | | | | | | | | | | | |
| BET | M0 | 0.3276 | 0.2206 | 0.6191 | 0.0952 | 1.2301 | 2.7992 | 0.7753 | 0.8991 | 0.1782 | 2.7418 | 1.3352 | 1.2523 |
|  | C | 0.4901 | 0.5605 | 0.3153 | 0.9594 | 0.1585 | 0.0836 | 0.1925 | 0.2028 | 0.6205 | 0.0727 | 0.1538 | 0.1564 |
|  | r2 | 0.9897 | 0.9708 | 0.9141 | 0.9983 | 0.9843 | 0.9591 | 0.9419 | 0.9800 | 0.9955 | 0.9906 | 0.9773 | 0.9513 |
|  | %RMS | 11.7280 | 24.4863 | 29.9004 | 11.6097 | 15.5572 | 16.8867 | 38.3527 | 12.2807 | 14.3714 | 9.3996 | 11.8144 | 17.1366 |
| Hasley | A | 0.1014 | 0.0860 | 0.0936 | 0.0953 | 0.0667 | 0.0646 | 0.0553 | 0.0693 | 0.0826 | 0.0532 | 0.0693 | 0.0665 |
|  | B | 1.2112 | 1.2118 | 1.2115 | 1.2115 | 1.2124 | 1.2125 | 1.2128 | 1.2124 | 1.2119 | 1.2128 | 1.2124 | 1.2124 |
|  | r2 | 0.9849 | 0.9732 | 0.9105 | 0.9856 | 0.9182 | 0.7634 | 0.8929 | 0.9368 | 0.9946 | 0.7446 | 0.9054 | 0.8811 |
|  | %RMS | 20.7014 | 14.6880 | 24.5372 | 56.4436 | 26.5385 | 32.9364 | 24.7850 | 14.5788 | 13.7323 | 35.4661 | 25.1749 | 23.4586 |
| Henderson | A | 2.9496 | 3.1820 | 3.4331 | 2.7644 | 6.1263 | 8.1273 | 6.0415 | 4.9971 | 3.2055 | 12.0457 | 5.9638 | 5.8154 |
|  | B | 0.6618 | 0.6221 | 0.7627 | 0.5422 | 1.0001 | 1.1842 | 0.8759 | 0.8788 | 0.6091 | 1.2821 | 1.0098 | 0.9646 |
|  | r2 | 0.9934 | 0.9296 | 0.9149 | 0.9894 | 0.9761 | 0.9655 | 0.9637 | 0.9901 | 0.9831 | 0.9894 | 0.9682 | 0.9605 |
|  | %RMS | 19.1335 | 38.6496 | 36.1211 | 29.3800 | 18.2591 | 16.3013 | 28.9731 | 7.3484 | 31.4534 | 7.3049 | 14.7621 | 18.8293 |

**Table S.7:** (Continued)

| Model | Constant | | CMCH Film | | | | | | | | | | | | | | | | | | | | | | |
| --- | --- | --- | --- | --- | --- | --- | --- | --- | --- | --- | --- | --- | --- | --- | --- | --- | --- | --- | --- | --- | --- | --- | --- | --- | --- |
|  |  | | Shrimp | | | | | | | | | Crab | | | | | | Squid | | | | | | | |
|  |  | | Plasticizer | | | | | | | | | Plasticizer | | | | | | Plasticizer | | | | | | | |
|  | | | - | | Gly | | Sor | | PEG400 | | | - | | Gly | | Sor | PEG400 | - | | Gly | | Sor | | | PEG400 |
| Three parameters | |  | |  | |  | |  | | |  | |  | | |  |  |  | | |  | |  |  | |
| GAB | M0 | | 0.0670 | | 3.7740 | | 0.1769 | | | 0.1758 | | 1.3133 | | | 0.9814 | 0.0285 | 0.1285 | 0.2681 | 4.8323 | | | 1.6612 | | | 0.2448 |
|  | C | | 1.6063 | | 0.0510 | | 0.8935 | | | 0.6209 | | 0.1486 | | | 0.2521 | 3.7245 | 1.1886 | 0.4538 | 0.0401 | | | 0.1246 | | | 0.7476 |
|  | K | | 0.9009 | | 1.1280 | | 0.8954 | | | 1.0261 | | 1.0070 | | | 0.8467 | 0.6006 | 0.7755 | 1.0023 | 1.0618 | | | 1.0209 | | | 0.7927 |
|  | r2 | | 0.9950 | | 0.9749 | | 0.9211 | | | 0.9990 | | 0.9844 | | | 0.9635 | 0.9722 | 0.9916 | 0.9961 | 0.9938 | | | 0.9776 | | | 0.9628 |
|  | %RMS | | 13.5557 | | 12.7881 | | 32.9701 | | | 14.6176 | | 15.4462 | | | 17.5029 | 41.7912 | 7.7750 | 11.9964 | 8.4257 | | | 11.4264 | | | 19.0388 |
| Lewicki-3 | A | | 0.9898 | | 0.9917 | | 0.9841 | | | 0.9978 | | 1.1128 | | | 1.0280 | 1.0837 | 1.0672 | 0.9913 | 1.0498 | | | 1.1037 | | | 1.0685 |
|  | B | | 0.4547 | | 0.5652 | | 0.3289 | | | 0.6645 | | 0.1049 | | | -0.0331 | 0.1445 | 0.1738 | 0.5424 | -0.0894 | | | 0.0984 | | | 0.1051 |
|  | C | | 0.3241 | | 0.4778 | | 0.1761 | | | 0.5836 | | -0.0335 | | | -0.2235 | 0.0360 | 0.0402 | 0.4546 | -0.2534 | | | -0.0493 | | | -0.0399 |
|  | r2 | | 0.9934 | | 0.9555 | | 0.9189 | | | 0.9978 | | 0.9772 | | | 0.9620 | 0.9603 | 0.9892 | 0.9936 | 0.9760 | | | 0.9687 | | | 0.9606 |
|  | %RMS | | 10.7107 | | 31.6624 | | 32.3434 | | | 12.1894 | | 19.1226 | | | 18.2226 | 32.2529 | 6.8744 | 19.3306 | 12.9791 | | | 15.8779 | | | 18.3596 |
